# Supplementary material for: Rich autobiographical memory recall benefits from both novelty and similarity to other daily experiences
Source: Research Square preprint supplement (doi:10.21203/rs.3.rs-7402294/v1), 2025-09-03
Supplement: Supplementary file 1 [file 9f2320bddac68a2c64872a61.pdf]

# Rich autobiographical memory recall benefits from both novelty and similarity to other daily experiences

Erin Welch, Victoria Schelkun, Camille Gasser, Kathryn Lockwood, Lila Davachi

## Supplementary Materials

**Table 1**

*Meaningful effects based on subsequent Bayesian models with full random effects structure*

| <i>Model</i>                                              | <i>Estimate</i> | <i>95% CrI</i>  | <i>% pd</i> | <i>Effect Type</i> |
|-----------------------------------------------------------|-----------------|-----------------|-------------|--------------------|
| event regularity ~ memory stability (new vs routine)      | -0.08           | [-0.13, -0.03]  | 0.15%       | new>routine        |
| event regularity ~ memory stability (periodic vs routine) | -0.06           | [-0.11, -0.01]  | 0.78%       | periodic>routine   |
| memory stability ~ memory vividness                       | 2.87            | [2.12, 3.61]    | 100%        | positive           |
| memory stability ~ memory vividness (new)                 | 2.48            | [0.84, 4.07]    | 99.83%      | positive           |
| memory stability ~ memory vividness (periodic)            | 2.43            | [1.43, 3.41]    | 100%        | positive           |
| memory stability ~ memory vividness (routine)             | 2.75            | [1.04, 4.46]    | 99.88%      | positive           |
| memory stability ~ episodic detail                        | 4.04            | [2.59, 5.38]    | 100%        | positive           |
| memory stability ~ episodic detail (new)                  | 3.98            | [1.02, 6.78]    | 99.53%      | positive           |
| memory stability ~ episodic detail (periodic)             | 3.7             | [1.88, 5.48]    | 99.95%      | positive           |
| memory stability ~ episodic detail (routine)              | 2.96            | [-0.81, 6.79]   | 94.03%      | positive           |
| event regularity ~ RSS (new vs periodic)                  | 0.018           | [0.007, 0.029]  | 99.83%      | periodic>new       |
| event regularity ~ RSS (new vs routine)                   | 0.032           | [0.019, 0.045]  | 100%        | routine>new        |
| event regularity ~ RSS (periodic vs routine)              | 0.014           | [0.002, 0.27]   | 98.80%      | routine>periodic   |
| RSS ~ memory vividness (new)                              | 2.16            | [0.20, 4.08]    | 98.38%      | positive           |
| RSS ~ memory vividness (routine)                          | -2.88           | [-5.47, -0.41]  | 1.05%       | negative           |
| RSS ~ memory stability (routine)                          | -0.56           | [-1.18, 0.015]  | 2.85%       | negative           |
| event regularity ~ excited rating (new vs periodic)       | -0.22           | [-0.36, -0.07]  | 0.30%       | new>periodic       |
| event regularity ~ excited rating (new vs routine)        | -0.41           | [-0.60, -0.21]  | 0%          | new>routine        |
| event regularity ~ excited rating (periodic vs routine)   | -0.19           | [-0.37, -0.14]  | 1.80%       | periodic>routine   |
| event regularity ~ calm rating (new vs periodic)          | 0.2             | [0.07, 0.33]    | 99.90%      | periodic>new       |
| event regularity ~ calm rating (new vs routine)           | 0.38            | [0.18, 0.58]    | 99.98%      | routine>new        |
| event regularity ~ calm rating (periodic vs routine)      | 0.18            | [0.004, 0.36]   | 97.73%      | routine>periodic   |
| event regularity ~ afraid (new vs periodic)               | -0.12           | [-0.25, 0.003]  | 2.80%       | new>periodic       |
| event regularity ~ afraid (new vs routine)                | -0.24           | [-0.38, -0.11]  | 0%          | new>routine        |
| event regularity ~ afraid (periodic vs routine)           | -0.12           | [-0.25, 0.008]  | 3.35%       | periodic>routine   |
| RSS ~ afraid rating                                       | -1.34           | [-1.90, -0.80]  | 0%          | negative           |
| event regularity ~ RES (new vs periodic)                  | 0.016           | [0.008, 0.024]  | 99.98%      | periodic>new       |
| event regularity ~ RES (new vs routine)                   | 0.023           | [0.008, 0.039]  | 99.88%      | routine>new        |
| RES ~ memory vividness                                    | -1.77           | [-2.81, -0.77]  | 0%          | negative           |
| RES ~ memory vividness (periodic)                         | -1.61           | [-1.86, -1.37]  | 0%          | negative           |
| RES ~ episodic details                                    | -4.42           | [-7.63, -1.23]  | 0.30%       | negative           |
| RES ~ episodic details (new)                              | -7.16           | [-13.76, -0.62] | 1.73%       | negative           |

|                                                       |        |                |        |                  |
|-------------------------------------------------------|--------|----------------|--------|------------------|
| RES ~ episodic details (periodic)                     | -4.85  | [-9.02, -0.72] | 1.10%  | negative         |
| event regularity ~ memorability (new vs periodic)     | -0.822 | [-0.97, -0.67] | 0%     | new>periodic     |
| event regularity ~ memorability (new vs routine)      | -1.27  | [-1.53, -1.01] | 0%     | new>routine      |
| event regularity ~ memorability (periodic vs routine) | -0.45  | [-0.66, -0.23] | 0%     | periodic>routine |
| RES ~ memorability                                    | -2.87  | [-3.92, -1.91] | 0%     | negative         |
| RES ~ memorability (new)                              | -0.82  | [-0.97, -0.67] | 0%     | negative         |
| RES ~ memorability (periodic)                         | -1.26  | [-1.51, -1.03] | 0%     | negative         |
| RES ~ memorability (routine)                          | -0.44  | [-0.66, -0.23] | 0%     | negative         |
| day-level novelty ~ current positive rating           | 0.22   | [0.10, 0.34]   | 99.98% | positive         |

Results from the full-random-effects Bayesian models corresponding with random-intercept-only Frequentist models with significant effects (see *Methods*). ‘95% CrI’ represents the credibility interval. ‘%pd’ represents the percent of posterior slopes that were greater than zero. Bayesian effects were deemed meaningful when the percentage of posterior slopes was either greater than 95% (meaning a majority of posterior slopes were positive) or less than 5% (meaning a majority of posterior slopes were negative). ‘Effect type’ details the nature of the effect (i.e., whether the effect is positive, negative, or which level in a categorical variable is greater when a pairwise comparison was made).

**Table 2**

*Post-hoc ANOVA tests comparing ‘original’ to ‘reduced’ models of novelty predicting memory outcomes*

| <i>Original model</i>                        | <i>Reduced model</i>                   | <i>Chi-squared</i>   | <i>P-value</i> |
|----------------------------------------------|----------------------------------------|----------------------|----------------|
| event regularity*RSS + RES ~ vividness       | event regularity*RSS ~ vividness       | $\chi^2(1) = 12.41$  | $p < 0.001$    |
| event regularity*RSS + RES ~ vividness       | RES ~ vividness                        | $\chi^2(5) = 219.59$ | $p < 0.001$    |
| event regularity*RSS + RES ~ episodic detail | event regularity*RSS ~ episodic detail | $\chi^2(1) = 8.72$   | $p = 0.003$    |
| event regularity*RSS + RES ~ episodic detail | RES ~ episodic detail                  | $\chi^2(5) = 26.80$  | $p < 0.001$    |
| event regularity*RSS + RES ~ mem. stability  | event regularity*RSS ~ mem. stability  | $\chi^2(1) = 1.71$   | $p = 0.191$    |
| event regularity*RSS + RES ~ mem. stability  | RES ~ mem. stability                   | $\chi^2(5) = 18.43$  | $p = 0.002$    |

Post-hoc ANOVAs were run to verify that the multilevel Frequentist models used for our statistical analyses better explained the variance in the dependent variables (i.e., vividness ratings, total number of episodic details at recall, and memory stability) compared to reduced models. The ‘original model’ structure was a significantly better fit in all cases except one. Therefore, reported results predicting memory vividness, episodic detail at recall, and memory stability are based on the original multilevel models that include the interaction between RSS and event regularity, and RES as predictors in the model.

**Table 3**

*Effects of relative semantic similarity on emotion ratings at each event regularity level*

| <i>Model</i>                           | <i>Estimate</i> | <i>SE</i> | <i>95% CI</i> | <i>P-value</i> |
|----------------------------------------|-----------------|-----------|---------------|----------------|
| <b>RSS ~ happy rating (new)</b>        | 3.85            | 0.88      | [2.11, 5.58]  | $p < .001$     |
| <b>RSS ~ happy rating (periodic)</b>   | 3.59            | 0.51      | [2.59, 4.60]  | $p < .001$     |
| <b>RSS ~ happy rating (routine)</b>    | 3.21            | 1.06      | [1.13, 5.30]  | $p = 0.003$    |
| <b>RSS ~ excited rating (new)</b>      | 2.04            | 0.81      | [0.46, 3.63]  | $p = 0.012$    |
| <b>RSS ~ excited rating (periodic)</b> | 1.07            | 0.47      | [0.15, 1.98]  | $p = 0.022$    |

|                                       |       |      |                |             |
|---------------------------------------|-------|------|----------------|-------------|
| RSS ~ excited rating (routine)        | 1.11  | 0.97 | [-0.80, 3.02]  | $p = 0.254$ |
| <b>RSS ~ calm rating (new)</b>        | 1.76  | 0.79 | [0.20, 3.32]   | $p = 0.027$ |
| <b>RSS ~ calm rating (periodic)</b>   | 2.81  | 0.46 | [1.90, 3.72]   | $p < .001$  |
| <b>RSS ~ calm rating (routine)</b>    | 2.79  | 0.95 | [0.91, 4.66]   | $p = 0.004$ |
| RSS ~ sad rating (new)                | -0.94 | 0.59 | [-2.09, 0.21]  | $p = 0.109$ |
| <b>RSS ~ sad rating (periodic)</b>    | -1.39 | 0.34 | [-2.06, -0.71] | $p < .001$  |
| <b>RSS ~ sad rating (routine)</b>     | -1.43 | 0.70 | [-2.81, -0.05] | $p = 0.043$ |
| <b>RSS ~ afraid rating (new)</b>      | -1.65 | 0.57 | [-2.78, -0.53] | $p = 0.004$ |
| <b>RSS ~ afraid rating (periodic)</b> | -1.29 | 0.33 | [-1.93, -0.65] | $p < .001$  |
| RSS ~ afraid rating (routine)         | -0.59 | 0.69 | [-1.95, 0.76]  | $p = 0.389$ |

The within-event regularity multilevel Frequentist models that produced significant effects are bolded.
